# Supplementary material for: A turn-on fluorescence chemosensor based on a tripodal amine [tris(pyrrolyl-α-methyl)amine]-rhodamine conjugate for the selective detection of zinc ions
Source: Royal Society of Chemistry journal article supplement (doi:10.1039/c6an00486e), 2016-01-01
Supplement: c6an00486e1.pdf [file c6an00486e1.pdf]

## Turn-On fluorescence chemosensor based on a tripodal amine [tris(pyrrolyl- $\alpha$ -methyl)amine]-rhodamine conjugate for the selective detection of zinc ions

Rathinam Balamurugan, Wen-I Chang, Yandison Zhong, Sri Fitriyani and Jui Hsiang Liu\*

DOI: 10.1039/b000000x

|                                                                                                                                                         |     |
|---------------------------------------------------------------------------------------------------------------------------------------------------------|-----|
| Graphical picture of PR and response with Zn <sup>2+</sup>                                                                                              | S2  |
| Determination of quantum yield                                                                                                                          | S3  |
| Synthesis of RhB1 and H3tpa                                                                                                                             | S4  |
| Synthesis of H3tpaCO and PR                                                                                                                             | S5  |
| Fig. S1. <sup>1</sup> H-NMR spectrum of compound RhB1 in CDCl <sub>3</sub>                                                                              | S6  |
| Fig. S2. <sup>1</sup> H-NMR spectrum of compound H3tpa in CDCl <sub>3</sub>                                                                             | S7  |
| Fig. S3. <sup>1</sup> H-NMR spectrum of compound H3tpaCO in CDCl <sub>3</sub>                                                                           | S8  |
| Fig. S4. <sup>1</sup> H-NMR spectrum of the probe PR in DMSO-d <sub>6</sub>                                                                             | S9  |
| Fig. S5. . Mass spectrum of the probe PR<br>(a) low resolution (b) high resolution with spectrum                                                        | S10 |
| Fig. S6. Effect of pH on fluorescence intensity of PR in CH <sub>3</sub> CN at 577 nm                                                                   | S11 |
| Fig. S7. FT-IR spectra of PR (bottom) and PR with Zn <sup>2+</sup> (top)<br>S12                                                                         |     |
| Fig. S8. Time dependent UV-vis spectra (a) and PL spectra (b) of PR with<br>100 equivalents of Zn <sup>2+</sup> in CH <sub>3</sub> CN/water ( 9:1 v/v). | S13 |
| Fig. S9. Plots of absorbance (a) and fluorescence intensity (b) time dependence                                                                         | S14 |
| Fig. S10. Reversible process in UV-vis spectra (a) and PL spectra (b).                                                                                  | S15 |
| Fig. S11. (a) UV-vis spectra of PR in the presence of various zinc salts.<br>(b) PL spectra of PR in the presence of various zinc salts.                | S16 |
| Fig. S12. Temperature-dependent <sup>1</sup> H-NMR spectra of PR with Zn <sup>2+</sup><br>over temperatures ranging from 20 to 80 °C                    | S17 |
| Fig. S13. Optimized structures of PR and PR-Zn <sup>2+</sup>                                                                                            | S18 |
| Fig. S14. Hill Plot of fluorescence probe PR with Zn <sup>2+</sup><br>S19                                                                               |     |

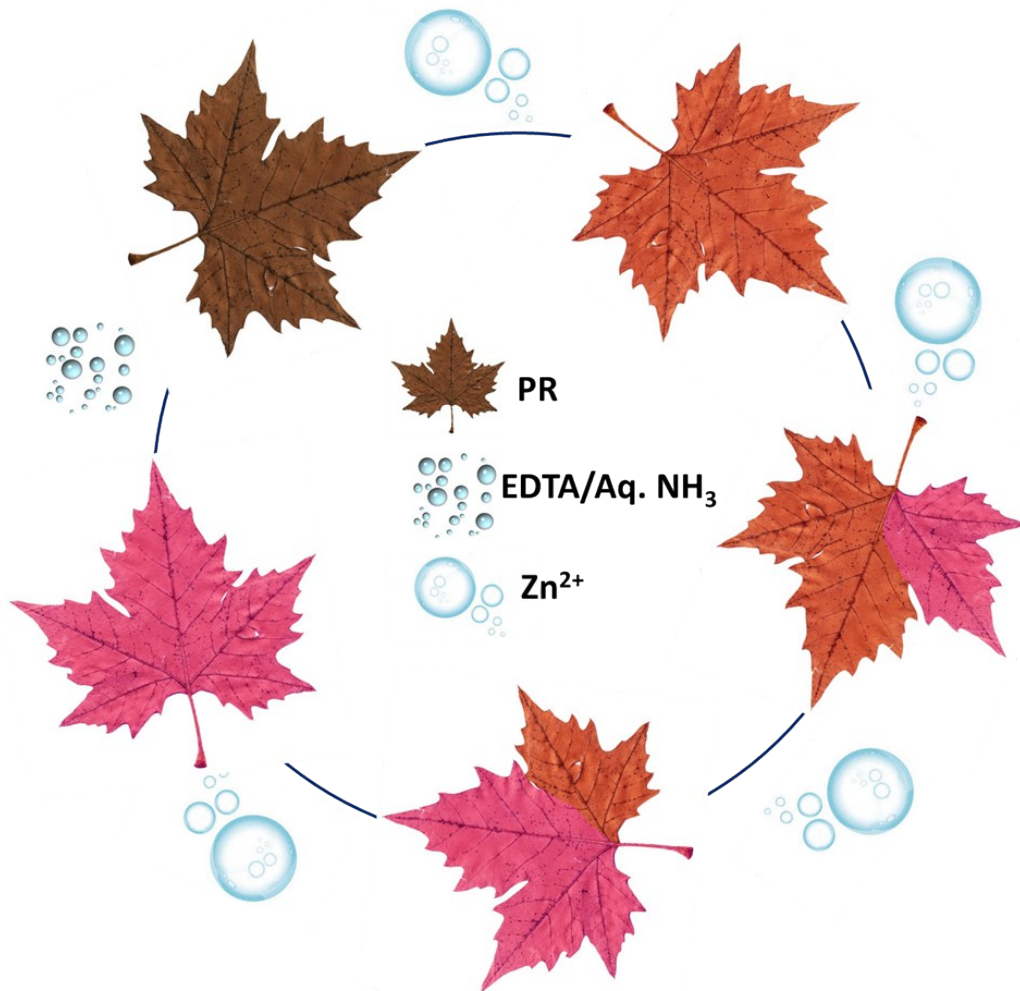

Graphical picture of PR and response with  $Zn^{2+}$

## Determination of fluorescence quantum yield

The quantum yield can be calculated as follows:

$$\Phi_D = \Phi_S \times \frac{F_D}{F_S} \times \frac{A_S}{A_D} \times \frac{(n_D)^2}{(n_S)^2}$$

Where  $\Phi_S$  is the fluorescence quantum yield of the standard (rhodamine B in ethanol, 0.49, 25°C),  $F_D$  and  $F_S$  are the integral areas of fluorescence intensity of the chromophore and the standard at the same excitation wavelength, respectively,  $A_D$  and  $A_S$  are the absorbances of the chromophore and the standard at the defined excitation wavelength, respectively, and  $n_S$  and  $n_D$  are the refractive indices at 25°C of the solvents of the standard (ethanol) and of the chromophore, respectively.

## Synthesis of precursors and the probe

Synthetic routes of precursors and the probe are shown in Scheme 3-1 to 3-3. The following details the experimental conditions and steps.

### Synthesis of RhB1

The intermediate **2** was synthesized by refluxing rhodamine B (4.8 g, 10 mmol) with excess ethylenediamine (5 mL) in ethanol until the solution lost its red color. After completion of the reaction, the solvent was removed by rotary evaporator. The resultant solid was extracted with dichloromethane and washed with water several times. The organic layer was separated and dried over anhydrous MgSO<sub>4</sub>, and then the solvent was removed thoroughly. The resultant solid was washed with hot hexane (10 mL) and dried. Finally, the crude solid was purified by column chromatography (eluent, EA: Hexane = 1:3, R<sub>f</sub> = 0.45) <sup>13a,b</sup>.

Yield= 80%. <sup>1</sup>H-NMR (400 MHz, CDCl<sub>3</sub>) δ: 7.88–7.90 (d, 1H, ArH), 7.42–7.45 (m, 2H, ArH), 7.07–7.09 (d, 1H, ArH), 6.26–6.43 (m, 6H, ArH), 3.20–3.35 (q, 8H, NCH<sub>2</sub>CH<sub>3</sub>), 3.17–3.18 (t, 2H, NCH<sub>2</sub>CH<sub>2</sub>N), 2.41–2.43 (t, 2H, NCH<sub>2</sub>CH<sub>2</sub>N), 0.85–1.55 (t, 12H, NCH<sub>2</sub>CH<sub>3</sub>).

Molecular formula: C<sub>30</sub>H<sub>32</sub>N<sub>4</sub>O<sub>2</sub> (484 g/mol).

### Synthesis of Tris(pyrrolyl- $\alpha$ -methyl)amine (H<sub>3</sub>tpa) (**3**)

Compound **3** was synthesized by following reported procedures<sup>14</sup>. Pyrrole (18 g), 37% aqueous formaldehyde (20 mL), NH<sub>4</sub>Cl (4.78 g), ethanol (60 mL) and water (20 mL) were mixed in a 250 mL flask. The mixture was stirred at 40°C for 1 h. Then, it was poured into 200 mL of water and extracted three times with ethyl acetate. The combined organic phase was dried over anhydrous MgSO<sub>4</sub>. After reaction, the solvent was removed by rotary evaporation. Remaining pyrrole impurities were removed by extracting the crude mixture in a mixture of ether (30 mL), THF (30 mL), and 20% NaOH<sub>(aq)</sub>. The upper layer of the mixture was collected and concentrated. After evaporation, pure compound **3** was observed.

Yield= 77%. <sup>1</sup>H-NMR (400 MHz, CDCl<sub>3</sub>) δ: 8.2 (s, 3H, NH), 6.7 (s, 3H, ArH), 6.12–6.16 (t, 3H, ArH), 6.07 (s, 3H, ArH), 3.58 (s, 6H, NCH<sub>2</sub>).

Molecular formula: C<sub>15</sub>H<sub>18</sub>N<sub>4</sub> (254 g/mol).

### Synthesis of Tris(5-formylpyrrol-2-ylmethyl)amine ( $H_3tpa^{CO}$ ) (**4**)

The intermediate **4** was acquired from the Vilsmeier–Haack formylation of **3**. The intermediate **3** (2 g) was dissolved in dimethylformamide (40 mL) and cooled to  $-10^\circ\text{C}$ .  $\text{POCl}_3$  (4.4 mL) was added dropwise over 10 minutes with vigorous stirring, and the solution became dark red. The mixture was removed from the ice bath and heated to  $60^\circ\text{C}$  for 2 h. An aqueous NaOH solution (6.00 g) were prepared and poured into the mixture. Then, the mixture was heated to  $80^\circ\text{C}$  for 1 h. After the reaction, it was cooled to room temperature and extracted with DCM:chloroform (1:1). The solvent was removed by rotary evaporator, yielding an oily crude product. This oily crude product was stirred with a large excess of acetonitrile for 16 h to precipitate the product **4**. The precipitate was filtered, washed with acetonitrile and dried. Product **4** was obtained as pale brown solid<sup>15</sup>.

Yield= 73%.  $^1\text{H-NMR}$  (400 MHz,  $\text{CDCl}_3$ )  $\delta$ : 11.19 (s, 3H,  $\text{CHO}$ ), 9.39 (s, 3H,  $\text{NH}$ ), 6.91–6.92 (d, 3H, ArH), 6.17–6.18 (d, 3H, ArH), 3.69 (s, 6H,  $\text{NCH}_2$ ).

FTIR (KBr,  $\nu_{\text{max}}/\text{cm}^{-1}$ ): 3457 (NH), 2766 (CHO), 1612 (CO).

Molecular formula:  $\text{C}_{18}\text{H}_{18}\text{N}_4\text{O}_3$  (338.36 g/mol).

### Synthesis of Pyrrol-Rhodamine Chemosensor (**PR**)

A solution of ethylenediaminyl Rhodamine B (1.18 g, 0.74 mmol) in anhydrous ethanol (50 mL) was added to the intermediate **4** (0.25 g, 2.44 mmol) and stirred for 2 days at  $80^\circ\text{C}$ . After completion of the reaction, the solvent was removed by rotary evaporation. The crude product was further purified and isolated by column chromatography (silica gel, 100–200 mesh) using methanol in DCM (10% v/v) as eluent.

Yield= 70%.  $^1\text{H-NMR}$  (400 MHz, DMSO)  $\delta$ : 10.98–11.95 (s, 3H,  $\text{NH}$ ), 7.72–7.90 (s, 3H,  $\text{CHN}$ ), 7.41–7.71 (m, 9H, ArH), 6.99–7.10 (d, 3H, ArH), 6.24–6.39 (m, 21H, ArH), 5.92–5.97 (d, 3H, ArH), 3.12–3.50 (m, 42H,  $\text{NCH}_2$ ), 1.01–1.10 (t, 36H,  $\text{CH}_2\text{CH}_3$ ).  $^{13}\text{C-NMR}$  (400 MHz,  $\text{CDCl}_3$ )  $\delta$ : 168 ( $\text{CO}$ ), 154 ( $\text{CHN}$ ), 149 (Ar), 134 (ArH), 132 (Ar), 129 (ArH), 128 (ArH), 127 (ArH), 124 (ArH), 122 (ArH), 118 (ArH), 118 (ArH), 116 (Ar), 98 (ArH), 78 (Ar), 77 (Ar), 65 ( $\text{NC-Ar}$ ), 50 ( $\text{NCH}_2$ ), 44 ( $\text{NCH}_2\text{CH}_3$ ), 42 ( $\text{CHN-CH}_2$ ), 41 ( $\text{NCH}_2$ ), 17 ( $\text{CH}_2\text{CH}_3$ ).

Mass spectrum (FAB, m/z): 1739 (M), Molecular formula:  $\text{C}_{108}\text{H}_{120}\text{N}_{16}\text{O}_6$  (1738 g/mol).

RhB-NH2 CDCl3 2014/12/11 AV500

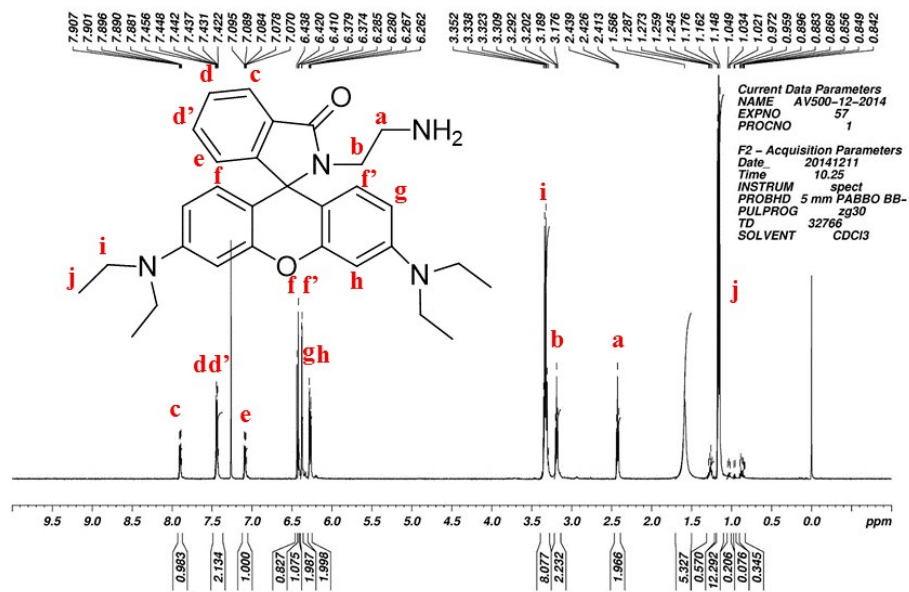

Fig. S1 <sup>1</sup>H-NMR spectrum of compound RhB1 in CDCl<sub>3</sub>

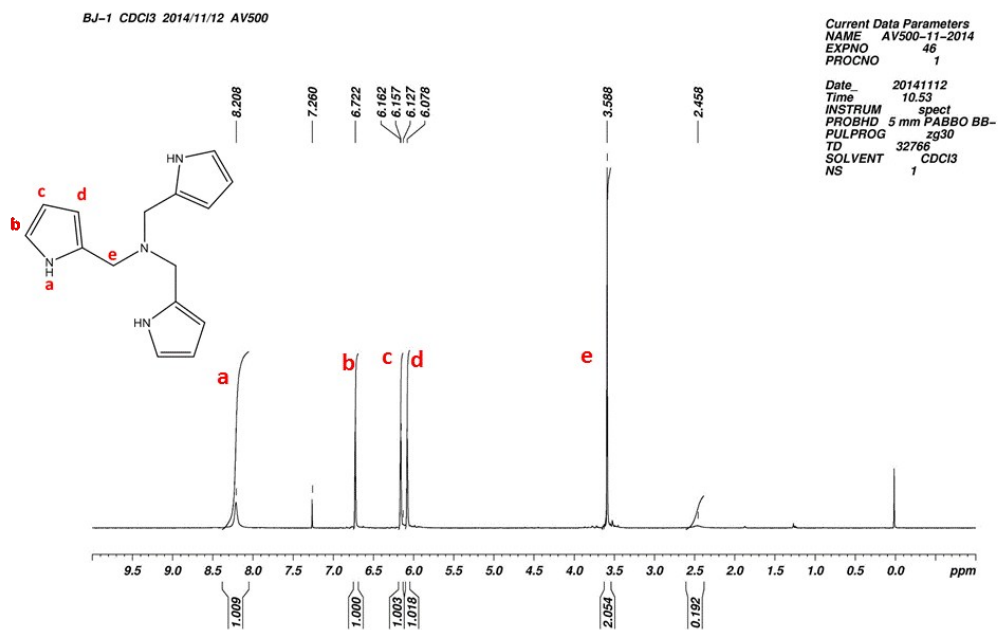

Fig. S2. <sup>1</sup>H-NMR spectrum of compound H<sub>3</sub>tpa in CDCl<sub>3</sub>.

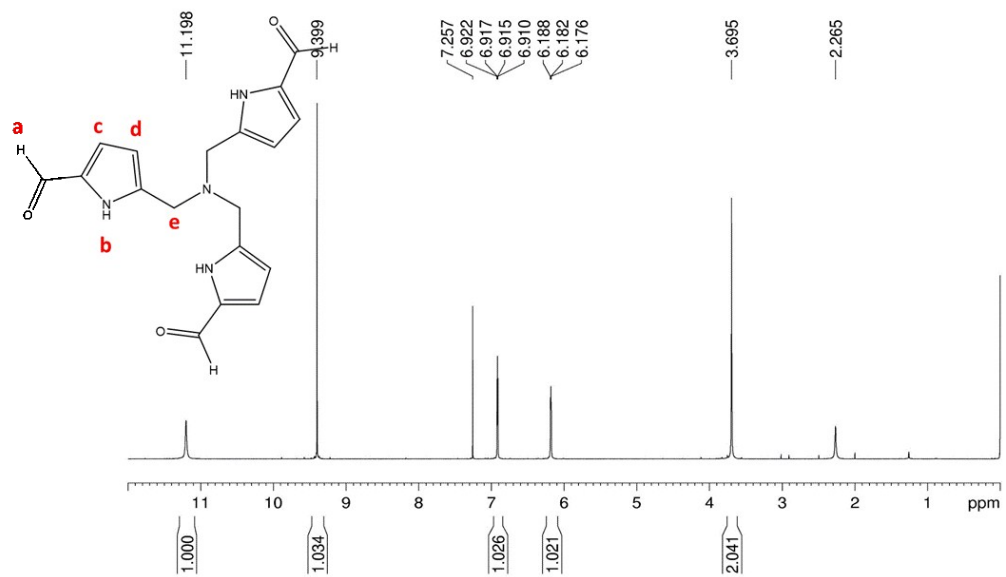

Fig. S3.  $^1H$ -NMR spectrum of compound  $H_3tpa^{CO}$  in  $CDCl_3$ .



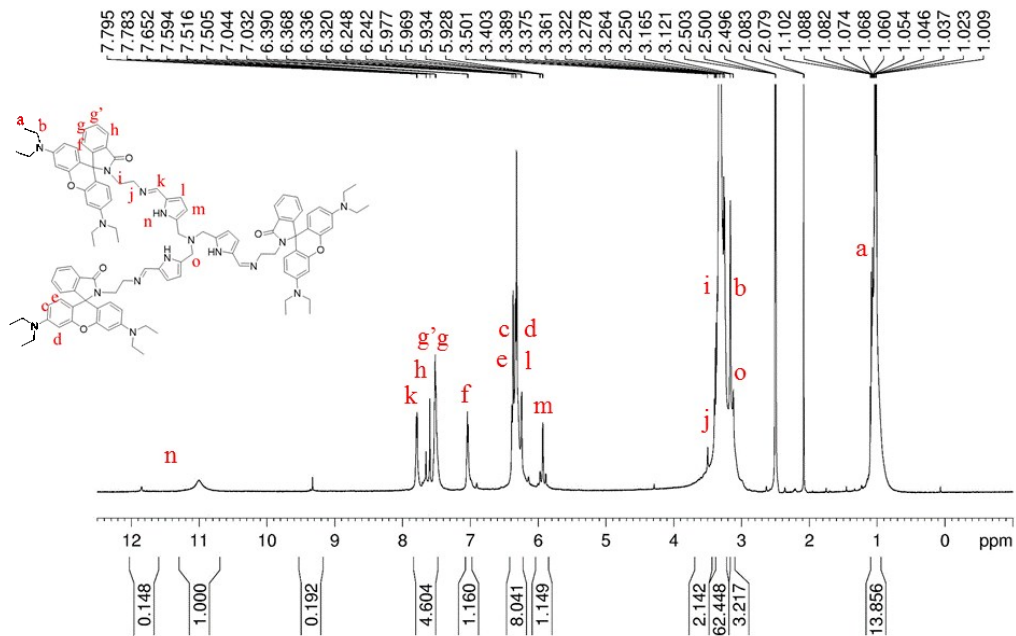

Fig. S4. <sup>1</sup>H-NMR spectrum of probe the PR in DMSO-d<sub>6</sub>.

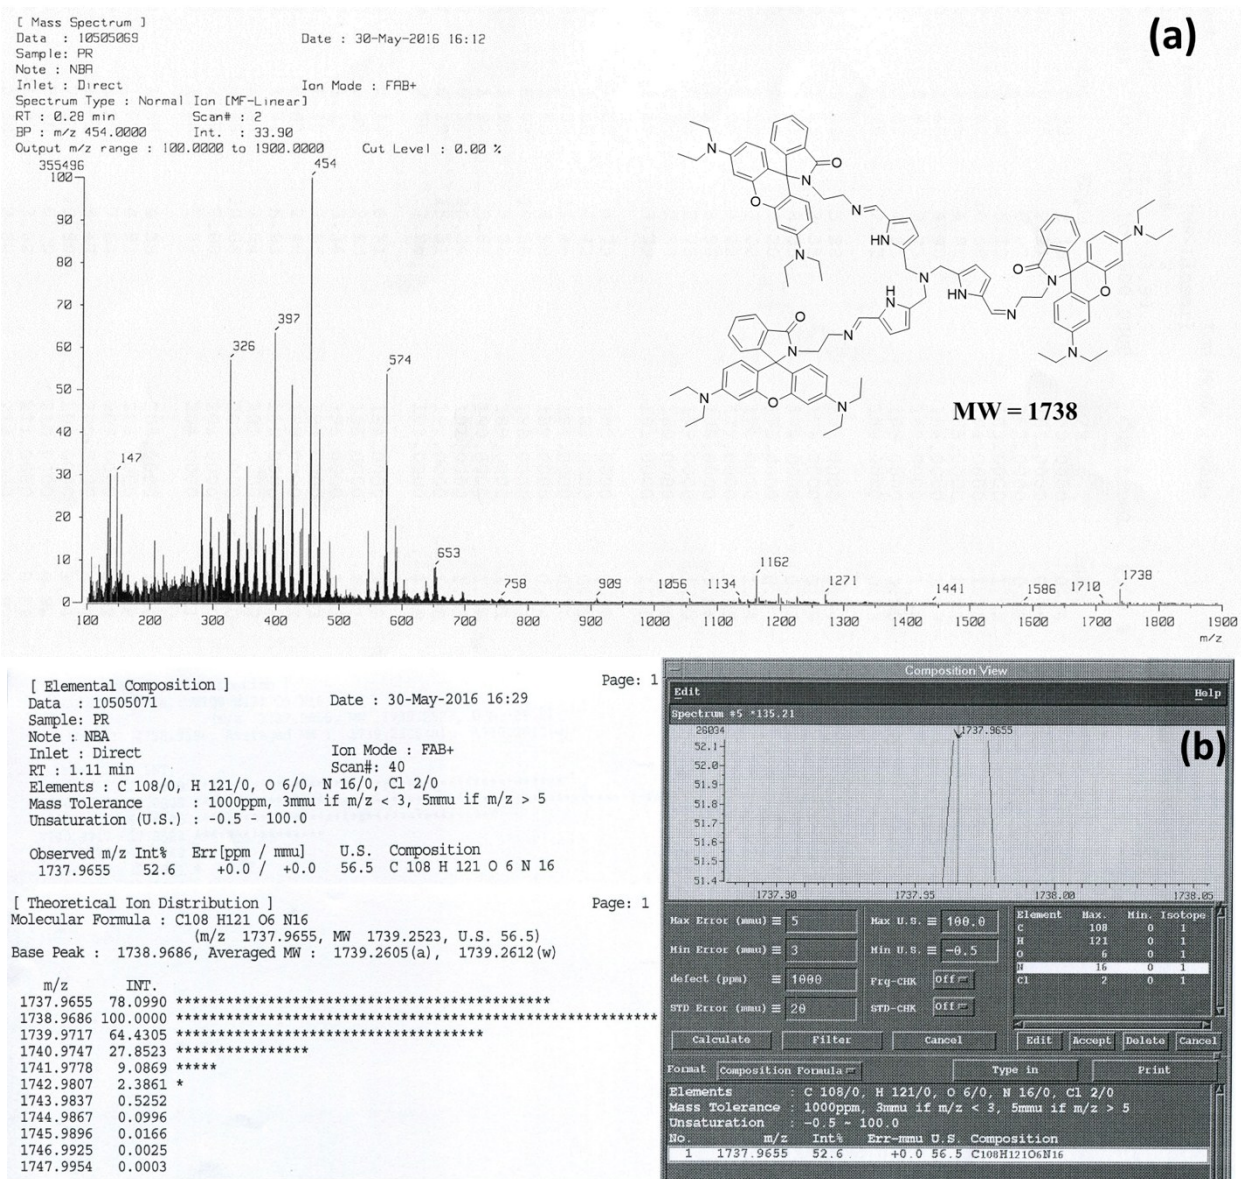

**Fig. S5.** Mass spectrum of the probe **PR** (a) low resolution (b) high resolution mass spectral data with spectrum

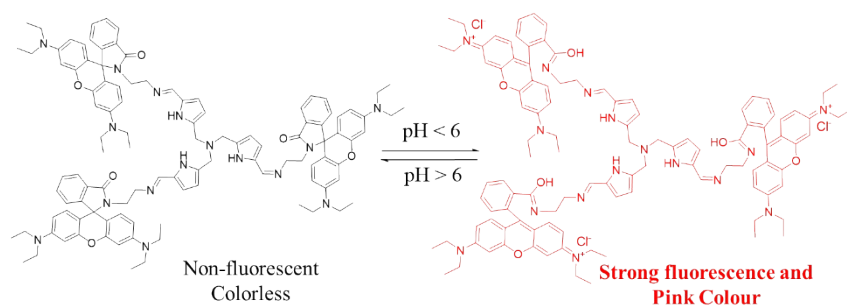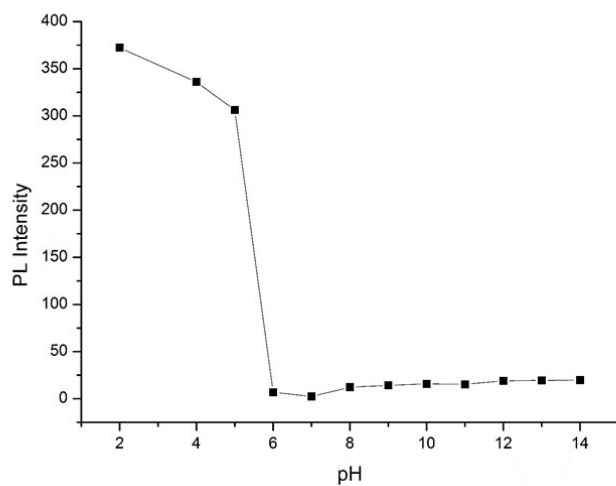

**Fig. S6.** Effect of pH on fluorescence intensity of **PR** in  $\text{CH}_3\text{CN}:\text{H}_2\text{O}$  (1:1 v/v) at 577 nm. The pH of the solutions was adjusted by HCl (1 M) and NaOH (1 M),  $\lambda_{\text{ex}} = 520 \text{ nm}$

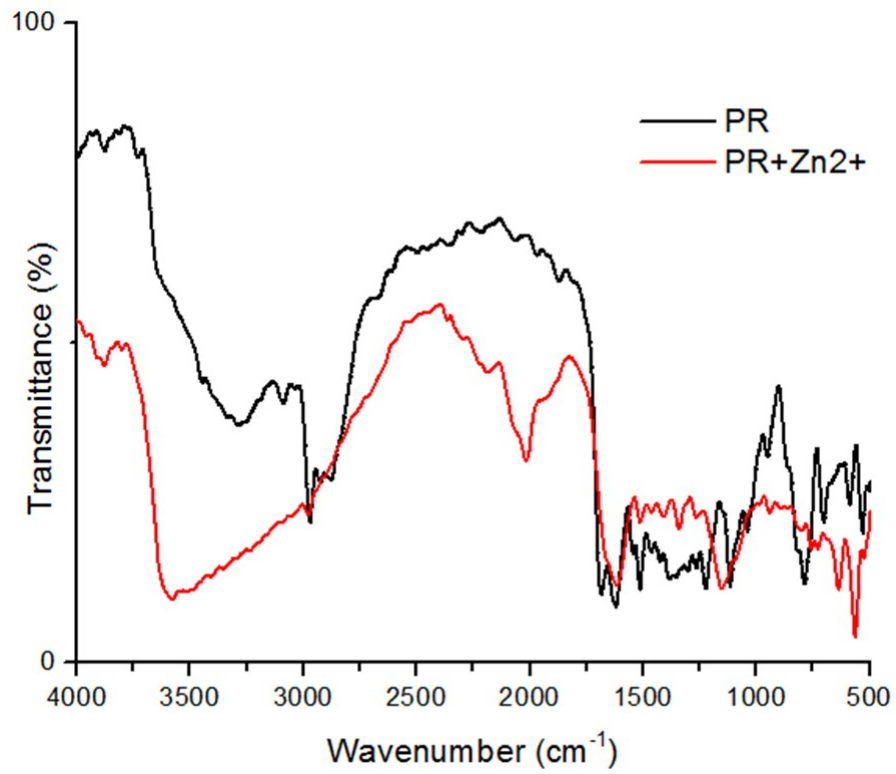

**Fig. S7.** FT-IR spectra of **PR** and PR-Zn<sup>2+</sup> complex

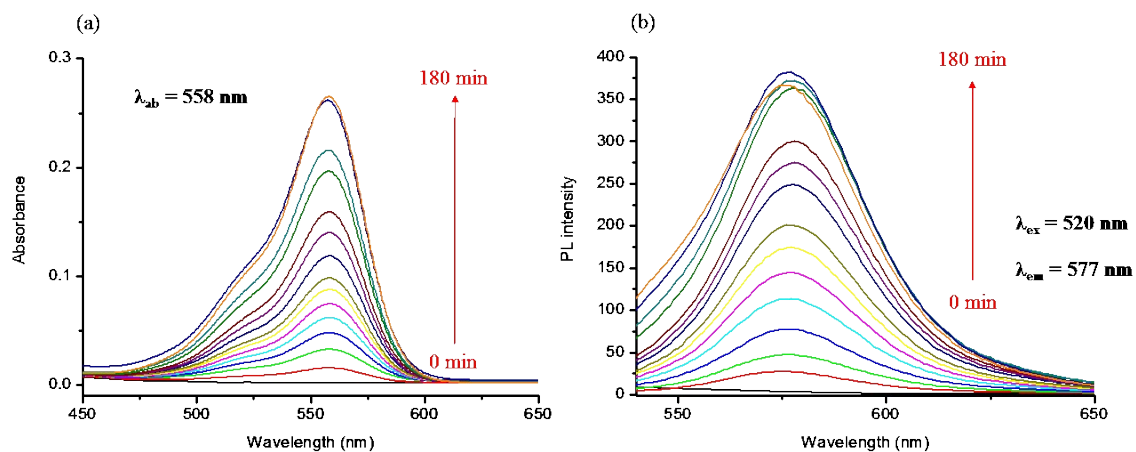

**Fig. S8.** Time dependent UV-vis spectra (a) and PL spectra (b) of PR with 100 equivalents of Zn<sup>2+</sup> in CH<sub>3</sub>CN/water (1:1 v/v).

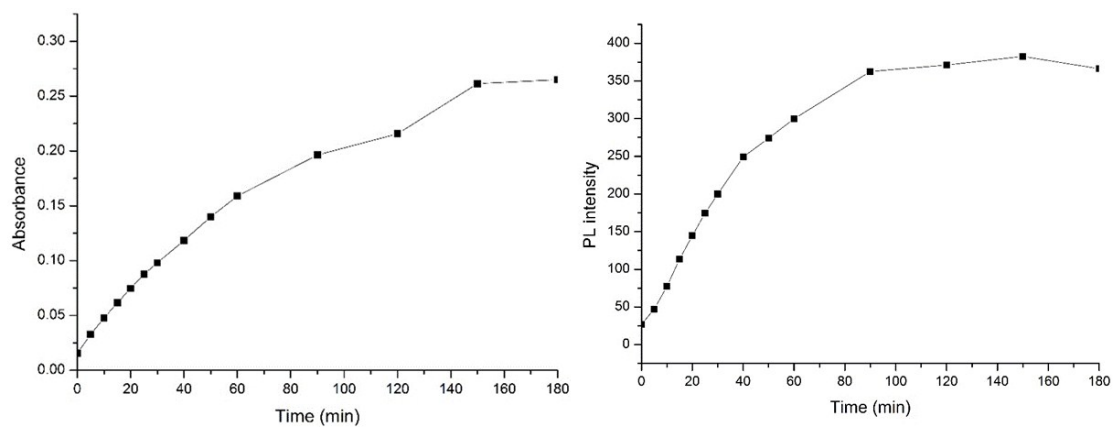

**Fig. S9.** Plots of absorbance (a) and fluorescence intensity (b) time dependence

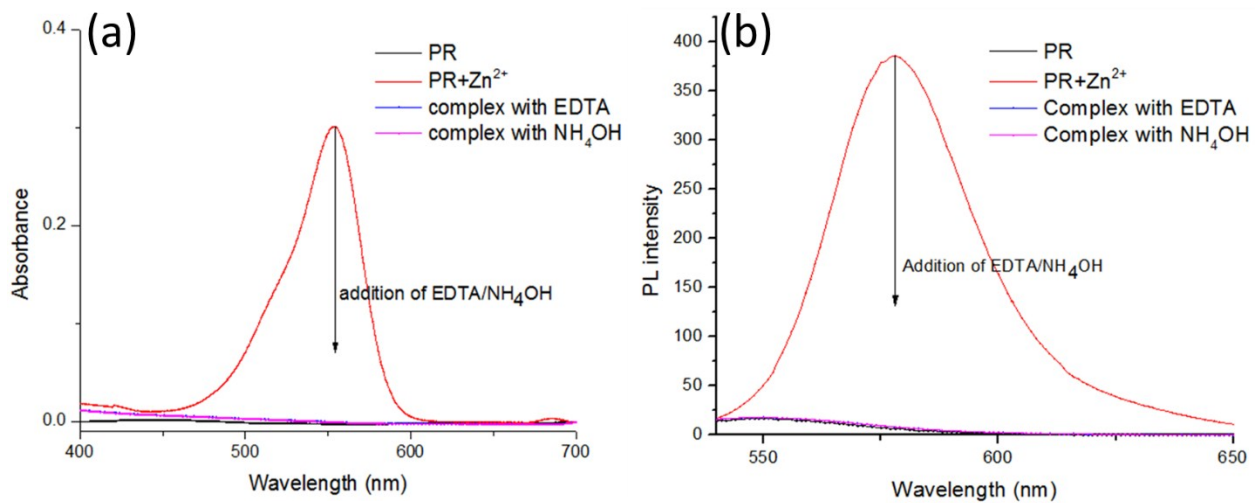

**Fig. S10.** Reversible process in UV-vis spectra (a) and PL spectra (b).

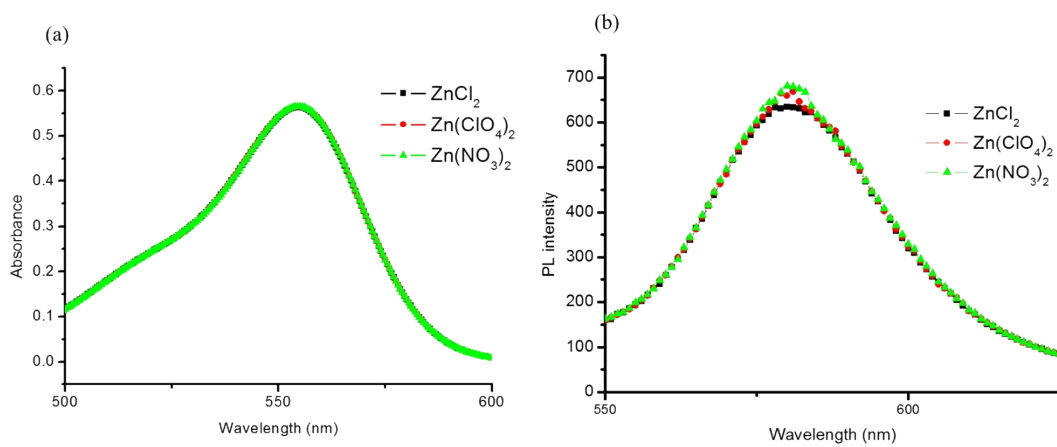

**Fig. S11.** (a) UV-vis spectra of **PR** in the presence of various zinc salts.

(b) PL spectra of **PR** in the presence of various zinc salts.



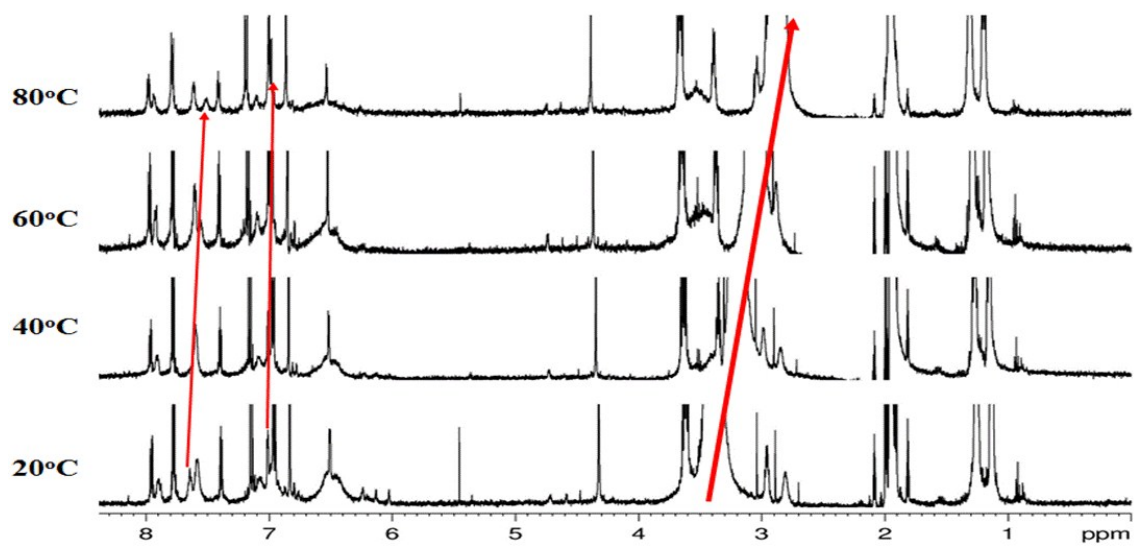

**Fig. S12.** Temperature dependent <sup>1</sup>H-NMR spectra of **PR** with Zn<sup>2+</sup> over temperatures ranging from 20 to 80°C

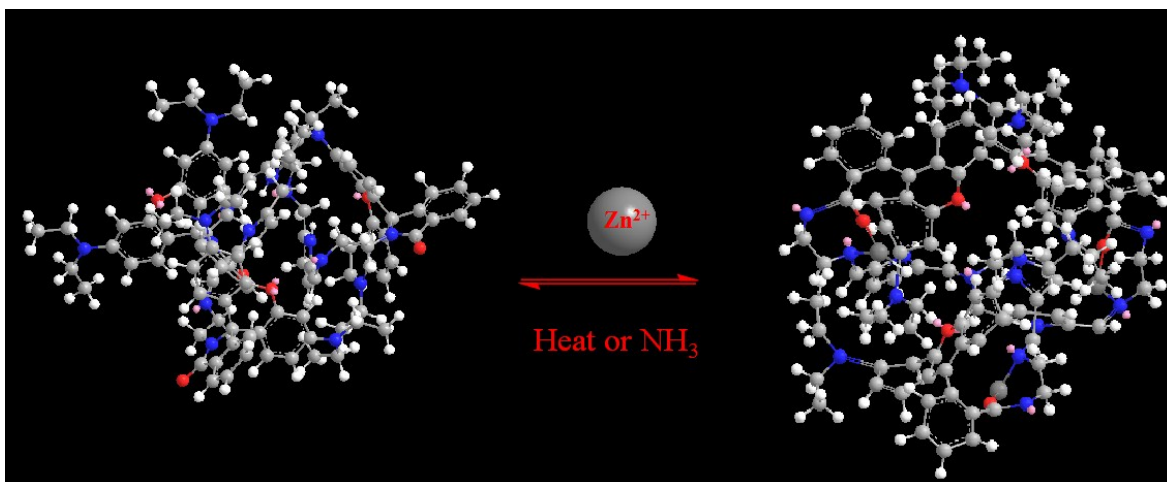

Fig. S13. Optimized structures of PR and PR-Zn<sup>2+</sup>.

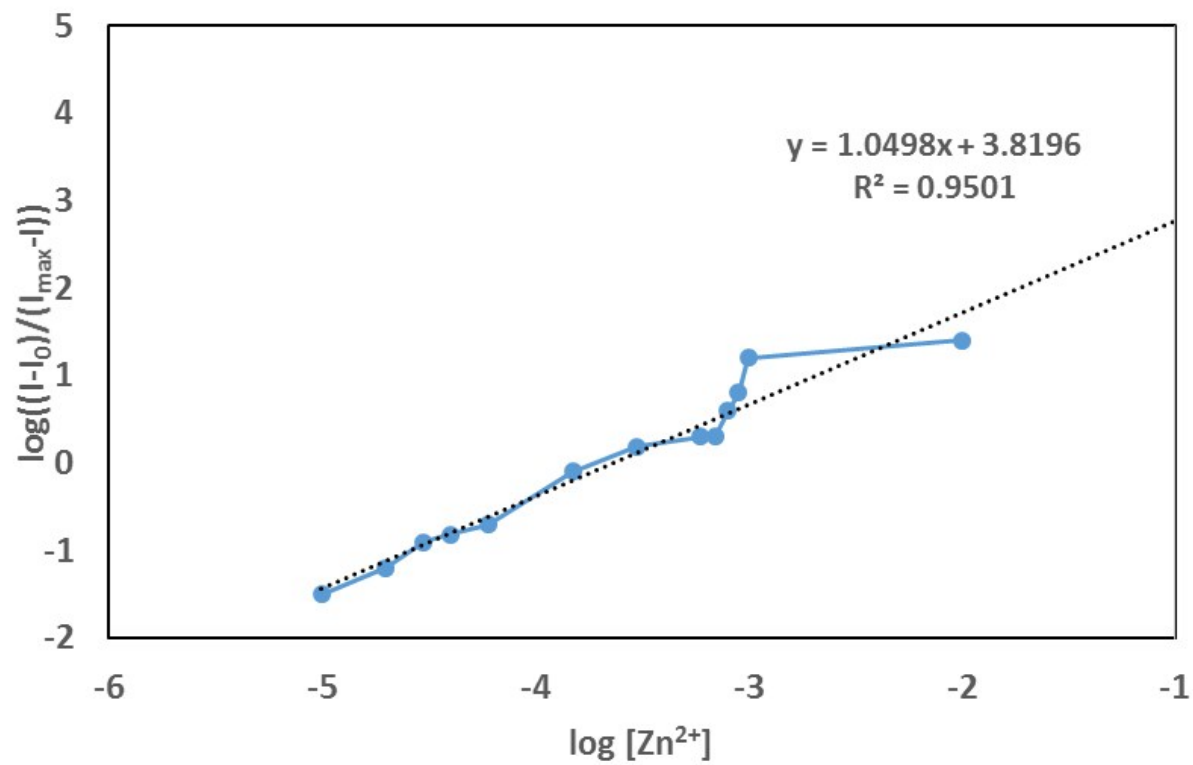

Fig. S14 Hill Plot of fluorescence probe PR with  $Zn^{2+}$
